# Supplementary material
Source: publisher site journal article supplement (https://www.dovepress.com/article/577488)
Supplement: Supplementary file 1 [file 577488%20Revised%20Supplementary%20Material.docx]

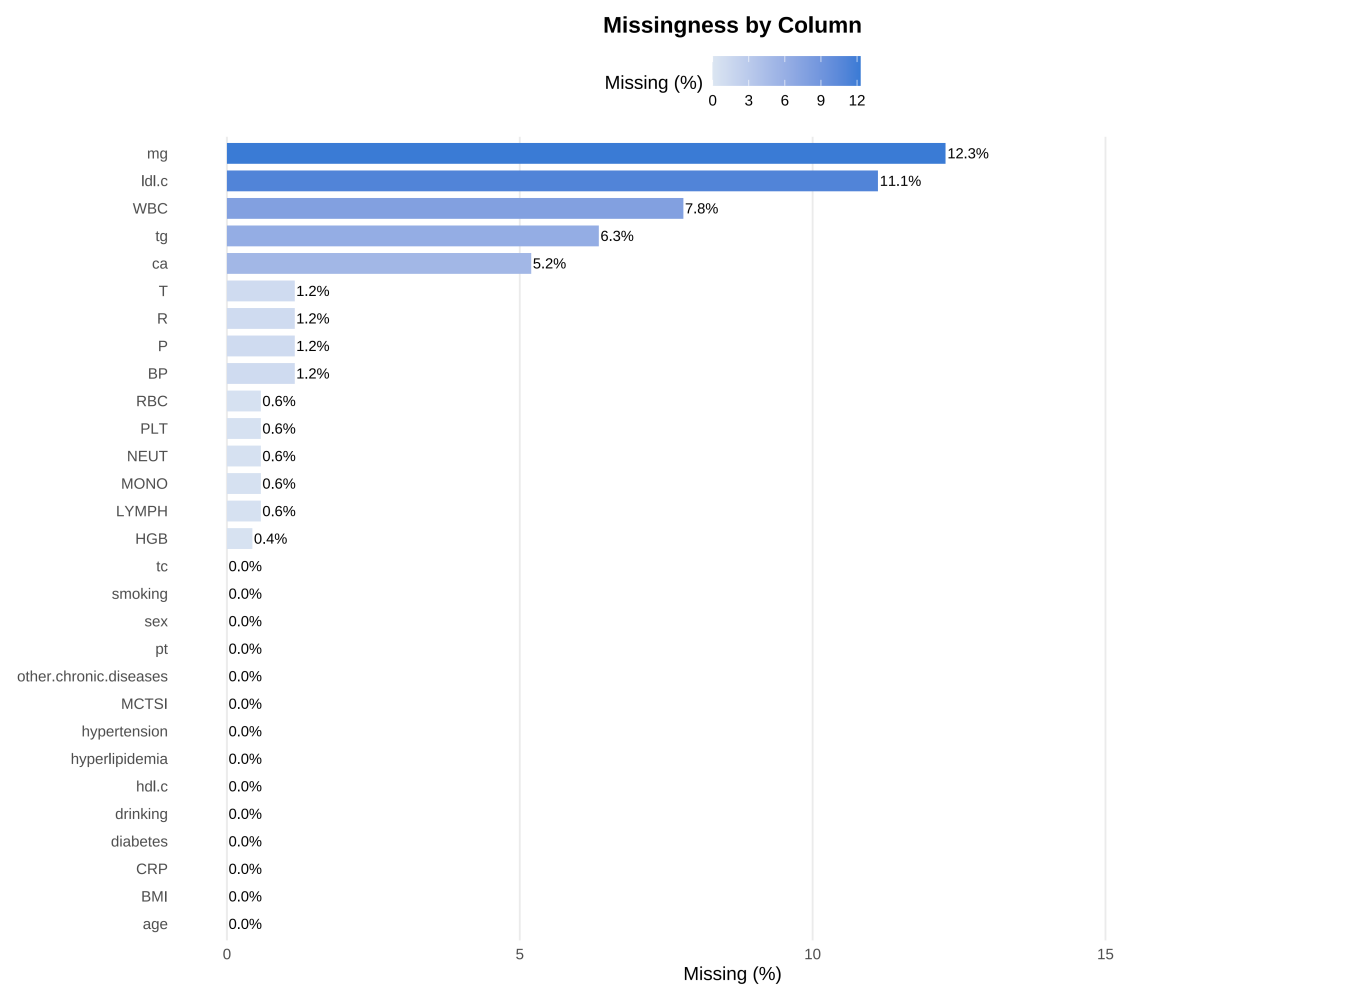


**Supplementary Figure 1. Missingness of baseline variables in the study cohort.**

| **Supplementary Table 1. Baseline clinical and laboratory characteristics of patients in the training and validation cohorts** | | | |
| --- | --- | --- | --- |
| **Characteristic** | **Training**  N = 4861 | **Validation**  N = 2071 | **p-value**2 |
| **Sex** | 300.00 (61.73%) | 142.00 (68.60%) | 0.085 |
| **Age** | 47.00 (35.00, 62.00) | 46.00 (33.00, 62.00) | 0.5 |
| **Etiology** |  |  | 0.7 |
| 1 | 204.00 (41.98%) | 77.00 (37.20%) |  |
| 2 | 68.00 (13.99%) | 31.00 (14.98%) |  |
| 3 | 55.00 (11.32%) | 26.00 (12.56%) |  |
| 4 | 159.00 (32.72%) | 73.00 (35.27%) |  |
| **BMI** | 26.12 (23.51, 29.38) | 26.35 (22.92, 30.19) | 0.9 |
| **Smoking** | 196.00 (40.33%) | 88.00 (42.51%) | 0.6 |
| **Drinking** | 191.00 (39.30%) | 91.00 (43.96%) | 0.3 |
| **Diabetes** | 85.00 (17.49%) | 35.00 (16.91%) | 0.9 |
| **Hypertension** | 131.00 (26.95%) | 64.00 (30.92%) | 0.3 |
| **Hyperlipidemia** | 128.00 (26.34%) | 45.00 (21.74%) | 0.2 |
| **Other chronic diseases** | 368.00 (75.72%) | 152.00 (73.43%) | 0.5 |
| **TC** | 3.91 (2.62, 5.18) | 3.70 (2.38, 4.82) | 0.11 |
| **TG** | 1.20 (0.83, 2.62) | 1.14 (0.72, 1.87) | 0.058 |
| **HDL-C** | 1.16 (0.87, 1.81) | 1.15 (0.87, 1.75) | 0.8 |
| **LDL-C** | 2.68 (1.96, 27.70) | 2.60 (1.99, 30.20) | >0.9 |
| **MG** | 0.82 (0.75, 0.89) | 0.82 (0.74, 0.89) | 0.8 |
| **CA** | 2.14 (2.02, 2.26) | 2.15 (2.00, 2.25) | 0.9 |
| **PT** | 12.70 (11.90, 13.60) | 12.50 (12.00, 13.60) | 0.8 |
| **WBC** | 11.25 (7.90, 14.70) | 11.20 (8.10, 14.70) | 0.7 |
| **NEUT** | 9.39 (5.85, 12.52) | 9.27 (6.12, 12.62) | 0.9 |
| **LYMPH** | 1.11 (0.75, 1.62) | 1.10 (0.78, 1.52) | 0.8 |
| **MONO** | 0.61 (0.43, 0.86) | 0.61 (0.40, 0.82) | 0.3 |
| **RBC** | 4.57 (4.10, 5.03) | 4.52 (3.98, 5.09) | 0.8 |
| **HGB** | 137.70 (114.00, 155.00) | 133.00 (111.00, 158.00) | 0.5 |
| **PLT** | 203.00 (158.00, 257.00) | 194.82 (151.00, 239.00) | 0.066 |
| **CRP** | 83.33 (33.21, 182.32) | 72.90 (17.81, 156.43) | 0.038 |
| **MCTSI** |  |  | 0.2 |
| 0 | 13.00 (2.67%) | 1.00 (0.48%) |  |
| 2 | 191.00 (39.30%) | 83.00 (40.10%) |  |
| 4 | 128.00 (26.34%) | 62.00 (29.95%) |  |
| 6 | 120.00 (24.69%) | 47.00 (22.71%) |  |
| 8 | 34.00 (7.00%) | 13.00 (6.28%) |  |
| 12 | 0.00 (0.00%) | 1.00 (0.48%) |  |
| **BISAP** |  |  | 0.4 |
| 0 | 115.00 (23.66%) | 43.00 (20.77%) |  |
| 1 | 157.00 (32.30%) | 77.00 (37.20%) |  |
| 2 | 148.00 (30.45%) | 52.00 (25.12%) |  |
| 3 | 52.00 (10.70%) | 28.00 (13.53%) |  |
| 4 | 13.00 (2.67%) | 7.00 (3.38%) |  |
| 5 | 1.00 (0.21%) | 0.00 (0.00%) |  |
| **ERAP** |  |  | 0.7 |
| 0 | 258.00 (53.09%) | 115.00 (55.56%) |  |
| 1 | 142.00 (29.22%) | 61.00 (29.47%) |  |
| 2 | 63.00 (12.96%) | 25.00 (12.08%) |  |
| 3 | 18.00 (3.70%) | 6.00 (2.90%) |  |
| 4 | 5.00 (1.03%) | 0.00 (0.00%) |  |
| **HRR** | 10.31 (7.96, 12.40) | 10.13 (7.62, 12.35) | 0.6 |
| **NLR** | 8.06 (4.42, 13.89) | 7.98 (4.93, 13.41) | >0.9 |
| **HALP** | 21.67 (9.16, 38.89) | 21.62 (7.47, 40.42) | 0.8 |
| **CAR** | 2.55 (1.03, 5.41) | 2.18 (0.55, 5.19) | 0.12 |
| **DDCa** | 284.28 (125.11, 686.02) | 293.72 (117.51, 736.31) | >0.9 |
| **SCTB** | 4.06 (2.30, 7.57) | 4.14 (2.76, 9.49) | 0.15 |

**Notes: Data are presented as n (%) for categorical variables and median (IQR) for continuous variables, unless otherwise indicated. The value in the Sex row indicates males. Etiology was coded as 1 = biliary; 2 = alcohol-related; 3 = hypertriglyceridemia-related; 4 = other.**

**Abbreviations: MODS, multiple organ dysfunction syndrome; BMI, body mass index; TC, total cholesterol; TG, triglycerides; HDL-C, high-density lipoprotein cholesterol; LDL-C, low-density lipoprotein cholesterol; Mg, magnesium; Ca, calcium; PT, prothrombin time; WBC, white blood cell count; NEUT, neutrophil count; LYMPH, lymphocyte count; MONO, monocyte count; RBC, red blood cell count; HGB, hemoglobin; PLT, platelet count; CRP, C-reactive protein; MCTSI, modified computed tomography severity index; BISAP, bedside index for severity in acute pancreatitis; ERAP, early risk assessment of acute pancreatitis; HRR, hemoglobin-to-red cell distribution width ratio; NLR, neutrophil-to-lymphocyte ratio; HALP, hemoglobin–albumin–lymphocyte–platelet index; CAR, C-reactive protein-to-albumin ratio; DDCa, D-dimer-to-calcium ratio; SCTB, serum creatinine-to-total bilirubin ratio.**

| **Supplementary Table 2. Performance of the 7-variable nomogram for predicting MODS across different etiologic subgroups of acute pancreatitis** | | | | | | | | | |
| --- | --- | --- | --- | --- | --- | --- | --- | --- | --- |
| **Etiology** | **N_total** | **N_MODS** | **AUC** | **95% Confidence Interval** | **Accuracy** | **Sensitivity** | **Specificity** | **PPV** | **NPV** |
| Biliary | 77 | 35 | 0.845 | 0.760–0.930 | 0.714 | 0.914 | 0.548 | 0.627 | 0.885 |
| Alcoholic | 31 | 10 | 0.829 | 0.632–1.000 | 0.806 | 0.800 | 0.810 | 0.667 | 0.895 |
| Hypertriglyceridemia | 26 | 7 | 0.669 | 0.416–0.922 | 0.654 | 0.429 | 0.737 | 0.375 | 0.778 |
| Other | 73 | 20 | 0.864 | 0.756–0.972 | 0.863 | 0.800 | 0.887 | 0.727 | 0.922 |

Abbreviations: MODS, multiple organ dysfunction syndrome; AUC, area under the curve; PPV, positive predictive value; NPV, negative predictive value
